# Supplementary material for: LncRNA SMARCD3-OT1 Promotes Muscle Hypertrophy and Fast-Twitch Fiber Transformation via Enhancing SMARCD3X4 Expression
Source: MDPI journal article supplement (doi:10.3390/ijms23094510), 2022-04-19
Supplement: s1 [file s1]

## Supplementary Material

**Table S1** Sequence of LncRNA *SMARCD3-OT1*

GRCg7b (chr2:118054-118633,133484-133684,134874-135641)

GATGGGAAGGTGAGGTGGTTCACCGTTGTTGTGGTCTGGGGACCTTTTCCTGCTTTTCTGGTG  
GTGGTCACATCCACCCCTGAAGCTGATCTGATGCTTCCAGATCCCTCTGCGCTGGTGAGAACCCA  
GGATCCCTCATCAGAGGTGGACCCTTCCAGCACCATGTCCTGGGATGAATGGTGATTTTGACCAT  
CTCCTACCTTGTGCAGACGGACACCCCATGAGGGCCCATATACTCCTCAAACCTTTCTTCTGGAAG  
ATACCACCATCCAAACCTGCGAGAGTGCATCTGCATTGCTGGCCTTCTTCAGGATGGTGGGGAG  
CAGGAGCTGCTTTGATTCTCCTTTCTCCCTTTGGGAAGGACACATACCCACCCCAAGGAGAGTG  
CTCCAGAGGGGATGACATCCCCTTTGCCAGGTCCTGCGGGACAGACTTGCCAGTTTCCCAGGG  
AAGCTGCTGCTCTGTGCTGTCTGCTTGGAAAGTGAGACCAGGTCATGTCCAGTGACCAGTCCAAT  
CTCAGTCTGTGGTATGGGGCTGTCAGCAGTGCCCTTCTTGGAGAATGACTTCAAAGTATGACGTG  
CCTGGAGGAGCCGTGCACCTTCTGAAAAGAACCAGTTTCTTGGTACTGCTTCAGTAGCAATCAA  
CACCCAGCTGTTACCATAGGGACACTGCCATGAGGAGCCAGATCTTTCCAAGCAGGATTCTTG  
CCCTTCGGCCCTAGGGAAGGAATCCCAGCCTGGCCCCGCTCCTTGGGCATCGTGAGGAGCTGG  
ATCCAAATGCATCTTCCGCTGCTCTCTTAGAGCTGCTCCTGCTTCAGGTCAATTAGAATGTCTGC  
TGCTCAGTCATCATGATACAATATCTGGTTTCTACCCCATCTGCTGTGGATAAGGTTGCTGCTCC  
CTCTTGGTCTGCACACATGTGACTGTAGGTGTTTGCCATCTGCCTAGCCTGGCACAGGAGAATGA  
AAAGCTGGAAGGCTTGGAATAATGTCCTACCTGCTGCTATAGGCGTATCACAGCTCCTTCAGGACT  
GACCTTCCACTGCTGCCTTGTGTTTTCCAGCCAAAATCTCCTGATACTTTAATGCCCATTTGATTT  
TTTTTTGTCTTTGACCCAAACGACTGTGAACTTTCCCCGCGTCTTCTCATGTACATCTCTGAA  
GATGGTAAAAAATGAAAGAAAGAAAGAAACCAGCAAACAGACAAAAACCTGCCTAGAACAA  
GCCCAGCCATCCCCAGACCTGCTGGCAGCTCCTTGCTTCCACCACTCGTCATCCTTGTGACATTT  
TGTTTACAACCTTTTACTTGCTGTTTGTGTTTGTGGACATTGGGTGTTACAGTCAGAATTCAGAC  
ATGTTTCCCTGCATTACATTCAAGTTGCTTTTGCCATTTTACTTCTGGCTGCCATTTCTCAAAGCTG  
TCGATGTTTGCTGTAATAATGCACTGCCTGAGATGAAAATTCCTTTTCTCAGGGGTCATCTTTTC  
ATAACTTTGTGATTATTTGCCAAATAAAATGATTTAAAAAGTCA

**Table S2** Sequences of different ORFs of LncRNA *SMARCD3-OT1*

| ORFs | sequences                                                                                                                                                                                |
|------|------------------------------------------------------------------------------------------------------------------------------------------------------------------------------------------|
| ORF1 | ATGGTGGGGAGCAGGAGCTGCTTTGATTCTCCTTTCCTCCCTTTGGGAAGGACA<br>CATACCCAACCCAGGAGAGTGCTCCAGAGGGGATGACATCCCCTTTGCCAGGTCC<br>TGCGGGACAGACTTGCCAGTTTCCCAGGGAAGCTGCTGCTCTGTGCTGTCTGCT<br>TGGAAGTGA |
| ORF2 | ATGTTTCCCTGCATTACATTCAAGTTGCTTTTGCCATTTTACTTCTGGCTGCCATTTT<br>TCAAAGCTGTCGATGTTTGCTGTAATAATGCACTGCCTGAGATGAAAATTCCTTT<br>TCTCAGGGGTCATCTTTTCATAACTTTGTGATTATTTTGCCAAATAAAATGATTTAA       |
| ORF3 | ATGAATGGTGATTTTGACCATCTCCTACCTTGTGCAGACGGACACCCCATGAGGG<br>CCCATATACTCCTCAAACCTTCTTCTGGAAGATACCACCATCCAAACCTGCGAGA<br>GTGCATCTGCATTGCTGGCCTTCTTCAGGATGGTGGGGAGCAGGAGCTGCTTTGA            |
| ORF4 | ATGATACAATATCTGGTTTCTACCCCATCTGCTGTGGATAAGGTTGCTGCTCCCT                                                                                                                                  |

| ORFs  | sequences                                                                                     |
|-------|-----------------------------------------------------------------------------------------------|
|       | CTTGGTCTGCACACATGTGACTGTAGGTGTTTGCCATCTGCCTAG                                                 |
| ORF5  | ATGCTTCCAGATCCCTCTGCGCTGGTGAGAACCCAGGATCCCTCATCAGAGGTGG<br>ACCTTCCAGCACCATGTCCTGGGATGAATGGTGA |
| ORF6  | ATGACTTCAAAGTATGACGTGCCTGGAGGAGCCGTGCACCTTCTGAAAAGAACC<br>AGTTTCTTGGTACTGCTTCAGTAG            |
| ORF7  | ATGTACATCTCTGAAGATGGTAAAAAATGAAAGAAAGAAAGAAACCAGCAAA<br>CAGACAAAAACCTGCCTAG                   |
| ORF8  | ATGTCCAGTGACCAGTCCAATCTCAGTCTGTGGTATGGGGCTGTCAGCAGTGCCC<br>TTCTTGGAGAATGA                     |
| ORF9  | ATGCATCTTCCGCCTGCTCTCTTAGAGCTGCTCCTGCTTCAGGTCAATTAG                                           |
| ORF10 | ATGAGGAGCCAGATCTTTCCAAGCAGGATTCTTGCCCTTCGGCCCTAG                                              |
| ORF11 | ATGGTGATTTTGACCATCTCCTACCTTGTGCAGACGGACACCCCATGA                                              |
| ORF12 | ATGGGGCTGTCAGCAGTGCCCTTCTTGGAGAATGACTTCAAAGTATGA                                              |
| ORF13 | ATGAAAAGCTGGAAGGCTTGAAAATGTCCTACCTGCTGCTATAG                                                  |
| ORF14 | ATGACGTGCCTGGAGGAGCCGTGCACCTTCTGA                                                             |

**Table S3** Sequence of 2,000 bp upstream of *SMARCD3X4*

CTCTTGCACTTACCTTATGCCTCTTAACAAAGAAAACCTCTTTGCAAACCTCTTTTGTGTAAGAG  
TAATGTTGTAGGAGCTTTTTCATACGTTTCTCTACAGAAAATCTTATCTAAGGACTAGGAAGAG  
ATCACTTCCTGTGTGAAACTGCTCAGAGACCTGGAGATTACTGGGCAACATGGGGCCATTTACC  
CCAGTCTGTGGTGAAGAAATGATGCATGAGGTGACGATCTCAGGCTCTGCTAAAAGGGCTAAC  
TTGGTATAATTGGTTTCTTCTGCTTCTGATGAAGGACTCCAACATTCTCAAGTTTTCAGATTTCT  
GCTTGCTTGTATGTGCACACACACATAAAGAGGGAGTACAAACACAGGCTTTTAACTGGACGT  
GACAACAGTGAGAACTGTTACTCTTTACATCTTTCTTATGTTTATGTAGGAGTTTGAGGATCTGC  
TGCCAGTTAAAATGTCAAAGTGTCAATGAGAAATCCTTAATATTGGAGAAATCTGGCTTCTGTG  
CTTGGTCCTTTGATGTATACTTTGCTATTATTATTAGTTACAATCAATGAACAAAAATTTACAGCT  
GGATCATGAGCTTGGAAGCTGAGAGGAGACTGGAAGAAGCTGTGCCAACAGCCAGCCTTTCTC  
TATACAAACATTAAAAATACTTGACAAGATGAACAAGCTGCAGTTCACCGGCTCAATGAAGGA  
GGTTTGTGTTTGGGGTTAAAGTGTGAGAGCCCAGCAGACTGTCAAGAAAGAACAACATAAAGA  
AGTGGAGTGCACGGAGAGCAGAAAGAAGAAAAAATGTGAAAGAGGAAAGGAAGGCCTAGA  
ATTATTTTCAGCAACTCAGTGAAATTGGAAGCAGAAGTAGCAACTTTAATCTGAGAAGAAAGCA  
AACAGCCTGTATAAAAAAAAAAAAAAAAAATCACAAATGTCTACAAAGATAGGCCTGGAATAGA  
GAAGCTCTACCTGGATGGTTATCTAGGAAGTCTCAGCAGATGAGAAAAAATTAATTTTGATTT  
TGAAAAAATAACATCTACACACTTCTGATGGAGGAAAAGCAAGTAGCAATAATAGCAA  
TCATATCTTGTGGTAATAACAAATCCCATGCATGTTACCCCTTCTCTTGGAGCAGCAAAAGAC  
ATGCTGTTTTTCCAGGAATCTGAGAGGAGAAATGCACATTTACTGTTTCAGTTTCTGTTACTTCTT  
CACTTTTCTCAGAGGAAAAAGCCATTGGTGAGTACAGTGCAAAGAATGTGGATAAATACAGAA  
AGAGTTTAGGATGATCATAGGTAGTTCTCTGCAAGGGGAGCTGCAAGGTAGAAGTTACACTAA  
TTTATAGATAGAGTAAATCTGTTATAAAAACTGTGGTAGGGTTCAGCTCGAACTTAAACACAGTC  
AAGGCAGAGCTAATGAGAGCAGCCAAATTTTAAGTCATGACACAGTTGAGCAGCTGAACATAA  
CTACTTCAGGTAAAGTACTTTGCTGTCCGACTCCACCGACCAGACCGCAGGCTTAGACACCT

GGTTCATGTATGTCTACACTTTTTTTTGTCTTCATAAGCAGCCACTTAGGCTATATGTCTTCTGAA  
 ATTTAAGATTGATCATTGCCCACTATTTTGGTCTTCCTTCCCCAACACAGCATACTAGTCACTGT  
 CATTATTGTAAGTATGGGTCTTCGTGACTCACCAGCCTCACATGTAGCTTCCACATCCTGCCCTC  
 GGGCCTAGTGGCTCAATATAAACTCGGGCCTGGGCATGTGGCTTCTGTACAGGTTATATTGCTG  
 GTGTGACCGTTTCTACTTGGCTATAATTATACCTTGGCTGTGGGGCCTGTTGTTTCTGTACAGTAG  
 ACTGACTTTGATGTTTGACTTTAGATGTGCCTCATAACCATGAGCTTTTCTGACGAGTTGGACAC  
 TGAGCACGAGTACCACCTCCTGGTTTGCCTTGCCTTATTCAGAACTGCTGGGCTGGGTCT  
 TGTTGGGGAGCC

**Table S4** Primers used for qRT-PCR

| Gene name          | Primer sequences (5'-3')                                | Size(bp) | Annealing temperature (°C) |
|--------------------|---------------------------------------------------------|----------|----------------------------|
| <i>SMARCD3-OT1</i> | F: CAGTCTGTGGTATGGGGCT<br>R: AGGCGGAAGATGCATTTGG        | 276      | 58                         |
| <i>SMARCD3X4</i>   | F: CAGTTCCTCTCTCAGCAC<br>R: CAAAATCACCATTTCATCC         | 272      | 58                         |
| <i>GAPDH</i>       | F: CAACTTTGGCATTGTGGAGG<br>R: CGCTGGGATGATGTTCTGG       | 130      | 58                         |
| <i>CDKN1A</i>      | F: CGTCTCGGTCTCGAAGTTGA<br>R: CGTCTCGGTCTCGAAGTTGA      | 133      | 58                         |
| <i>CDKN1B</i>      | F: TCGCTGTGCTGGGCTGAA<br>R: CAAGGACGAAAGGATGTGGG        | 188      | 58                         |
| <i>CCNA1</i>       | F: CCCGTAGACCACGAGCAGAT<br>R: TCAGGCAAGGCACAATCTCA      | 217      | 58                         |
| <i>CCND1</i>       | F: CAGAAGTGCGAAGAGGAAGT<br>R: CTGATGGAGTTGTCCGTGTA      | 158      | 58                         |
| <i>CCNE1</i>       | F: CTGCTGGTTCTAACTCCTGCTC<br>R: TGGCGTACTCGATCCATTTCTAT | 260      | 58                         |
| <i>MYF5</i>        | F: CCTCATGTGGGCTTGCAAA<br>R: CCTTCCGCCGGTCCAT           | 168      | 58                         |
| <i>MYOD</i>        | F: CCTCATGTGGGCTTGCAAA<br>R: CTGGGCTCCACTGTCACTCA       | 200      | 58                         |
| <i>MYOG</i>        | F: CGGAGGCTGAAGAAGGTGAA<br>R: CGGTCCTCTGCCTGGTCAT       | 320      | 58                         |
| <i>MyHC</i>        | F: CTCCTCACGCTTTGGTAA<br>R: CTCCTCACGCTTTGGTAA          | 213      | 58                         |
| <i>U6</i>          | F: CTCGCTTCGGCAGCACA<br>R: AACGCTTCACGAATTTGCGT         | 189      | 58                         |
| <i>Beta-actin</i>  | F: GATATTGCTGCGCTCGTTG<br>R: TTCAGGGTCAGGATACCTCTTT     | 194      | 58                         |
| <i>TNNC1</i>       | F: GTTGAGCAGTTGACAGAAGA<br>R: GAACCATCATAACAAGGAAC      | 223      | 58                         |

| Gene name    | Primer sequences (5'-3')                            | Size(bp) | Annealing temperature (°C) |
|--------------|-----------------------------------------------------|----------|----------------------------|
| <i>TNNI1</i> | F: GAGGAGTGGGAGCAGGAGAT<br>R: TTCGTCCACAATCTCAACCT  | 231      | 58                         |
| <i>TNNT1</i> | F: GATATTGCTGCGCTCGTTG<br>R: TTCAGGGTCAGGATACCTCTTT | 139      | 58                         |
| <i>SRL</i>   | F: CCTCCTCGGGCTGGATGACA<br>R: GTTCTTGCTGCTTGCGGTTT  | 272      | 58                         |
| <i>TNNC2</i> | F: GAGCAGCAAAGATGGCGTCA<br>R: ATCACCGTGCCCAACTCCTT  | 151      | 58                         |
| <i>TNNT3</i> | F: AGAGGGAAGAAGCAAACAGC<br>R: GTCCACAGTTCCTTAGCCT   | 123      | 58                         |

**Table S5** Primers used for RACE

| Primer name                        | Primer sequences (5'-3')         | Annealing temperature (°C) |
|------------------------------------|----------------------------------|----------------------------|
| <i>SMARCD3-OT1</i><br>5'RACE outer | CTCACTTCCAAGCAGACAGCACAGAG<br>CA | Step down                  |
| <i>SMARCD3-OT1</i><br>5'RACE inner | GACAGCACAGAGCAGCAGCTTC           | Step down                  |
| <i>SMARCD3-OT1</i><br>3'RACE outer | CCAGGAGAGTGCTCCAGAGGGGATGA<br>CA | Step down                  |
| <i>SMARCD3-OT1</i><br>3'RACE inner | CCAAATGCATCTTCCGCCTGCTC          | Step down                  |

**Table S6** Primers used for plasmid construction

| Primer name                | Primer sequences (5'-3')                                  | Size(bp) | Annealing temperature (°C) |
|----------------------------|-----------------------------------------------------------|----------|----------------------------|
| <i>SMARCD3-OT1</i><br>ORF1 | F: ATGAATGGTGATTTTGACCATCTC<br>R: GGGAGCAGGAGCTGCTTTGG    | 165      | 58                         |
| <i>SMARCD3-OT1</i><br>ORF2 | F: ATGACTTCAAAGTATGACGTGCC<br>R: AGTTTCTTGGTACTGCTTCAGTGG | 78       | 58                         |
| <i>SMARCD3-OT1</i><br>ORF3 | F: CGTCTCGGTCTCGAAGTTGA<br>R: TGCTCCTGCTTCAGGTCAATTGG     | 51       | 58                         |
| <i>SMARCD3-OT1</i><br>ORF4 | F: AATGATACAATATCTGGTTTCCT<br>R: TAGGTGTTTGCCATCTGCCTGG   | 102      | 58                         |
| <i>SMARCD3-OT1</i><br>ORF5 | F: ATGTACATCTCTGAAGATG<br>R: AAACAGACAAAAACCTGCCTGG       | 72       | 58                         |
| <i>SMARCD3-OT1</i><br>ORF6 | F: ATGTTTGCTGTAATAAT<br>R: ATAATGCACTGCCTGAGATGG          | 33       | 58                         |
|                            | F: ATGGTGATTTTGACCATCT                                    | 48       | 58                         |

| Primer name                 | Primer sequences (5'-3')                                       | Size(bp) | Annealing temperature (°C) |
|-----------------------------|----------------------------------------------------------------|----------|----------------------------|
| <i>SMARCD3-OT1</i><br>ORF7  | R: TGTGCAGACGGACACCCCATGG                                      | 174      | 58                         |
| <i>SMARCD3-OT1</i><br>ORF8  | F: ATGGTGGGGAGCAGGAGCTGCTT<br>R: TCTGTGCTGTCTGCTTGGAAGTGG      |          |                            |
| <i>SMARCD3-OT1</i><br>ORF9  | F: ATGTCCAGTGACCAGTCCAAT<br>R: AGCAGTGCCCTTCTTGGAGAATGG        | 69       | 58                         |
| <i>SMARCD3-OT1</i><br>ORF10 | F: CGGAGGCTGAAGAAGGTGAA<br>R: GGATTCTTGCCCTTCGGCCCTGG          | 48       | 58                         |
| <i>SMARCD3-OT1</i><br>ORF11 | F: CTCCTCACGCTTTGGTAA<br>R: TGTCTGGGATGAATGGTGG                | 90       | 58                         |
| <i>SMARCD3-OT1</i><br>ORF12 | F: ATGGGGCTGTCAGCAGTGC<br>R: TGGAGAATGACTTCAAAGTATGG           | 48       | 58                         |
| <i>SMARCD3-OT1</i><br>ORF13 | F: ATGAAAAGCTGGAAGGCTTG<br>R: AAAATGTCCTACCTGCTGCTATGG         | 45       | 58                         |
| <i>SMARCD3-OT1</i><br>ORF14 | F: ATGTTTCCCTGCATTACATTCAAGT<br>R: ATTTTGCCAAATAAAATGATTGG     | 171      | 58                         |
| pEGFP-N1<br>mutation        | F: CACCGGTCGCCACCATTGTTAGCAAG<br>R: CTTGCTAACAATGGTGGCGACCGGTG | 4733     | 60                         |

**Table S7** Oligonucleotide used for interference

| Fragment name          | Sequences (5'-3')    |
|------------------------|----------------------|
| <i>ASO-SMARCD3-OT1</i> | AAACCTGCCTAGAACAGCCC |
| <i>ASO-SMARCD3X4</i>   | GGGAAAGACCAGCACAAAT  |

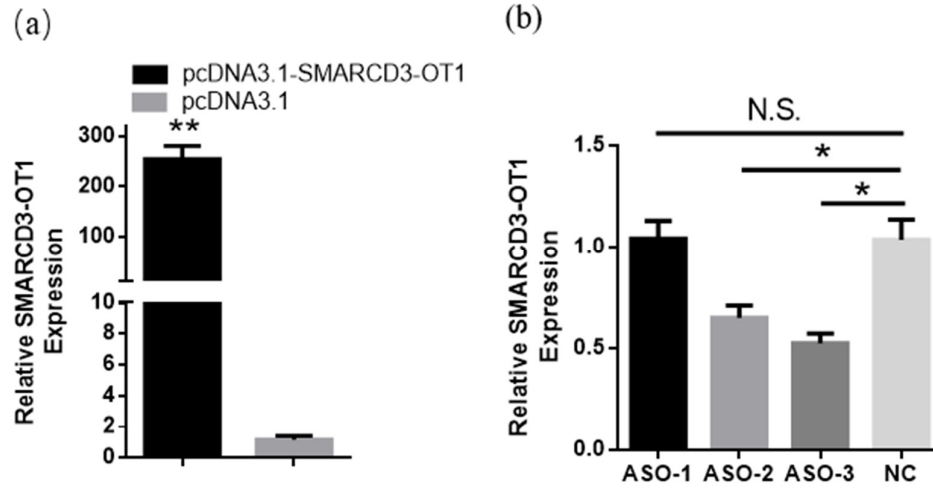

**Figure S1** The fold-changes of lncRNA *SMARCD3-OT1* after overexpression and knockdown. (a) Relative *SMARCD3-OT1* expression after introducing overexpression vector of *SMARCD3-OT1* into CPMs (n = 6). (b) Relative *SMARCD3-OT1* expression after introducing ASO of *SMARCD3-OT1* into CPMs (n = 6). Data are expressed as a fold change relative to the control. Results are shown as mean  $\pm$  SEM. Statistical significances of differences between means were assessed using an independent sample t-test. \* $p < 0.05$ , \*\* $p < 0.01$ .

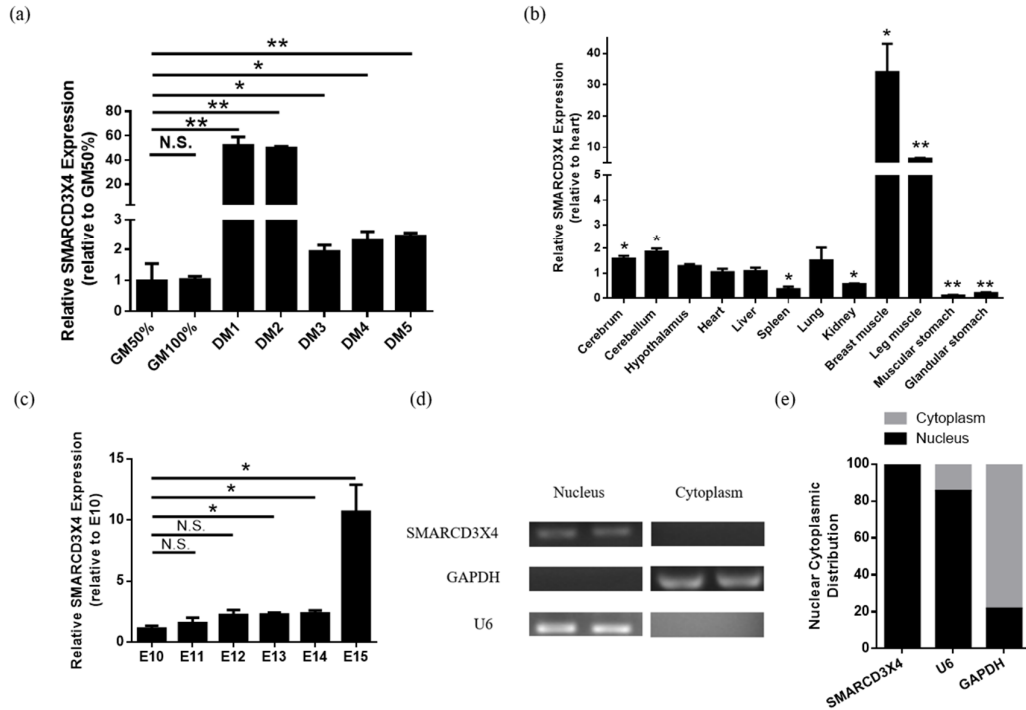

**Figure S2** The expression pattern of *SMARCD3X4*. **(a)** Expression levels of *SMARCD3X4* in CPMs cultured in growth medium at 50% and 100% cell confluency (50%GM and 100%GM) and differentiation medium from 1 to 5 days (DM1 to DM5) (n = 6). **(b)** Tissue expression profiles of *SMARCD3X4* in 7-week-old chickens (n = 6). **(c)** Expression levels of *SMARCD3X4* from embryonic day 10 (E10) to E15 (n = 6). **(d, e)** Distribution of *SMARCD3X4* in the cytoplasm and nuclei of CPMs was determined by PCR and qRT-PCR. Data are presented as mean  $\pm$  SEM. Statistical significance of differences between means was assessed using an independent sample t-test. \* $p < 0.05$ , \*\* $p < 0.01$ .

(a)

| TF  | Pattern name | Source   | Sequence name | Start | Stop | Strand | Score   | P value  | Q value  | Matched motif   |
|-----|--------------|----------|---------------|-------|------|--------|---------|----------|----------|-----------------|
| SP2 |              | database | SMARCD3X4     | 378   | 392  | -      | 18.3965 | 2.29e-07 | 0.000764 | CCCCCGCCCCCGCT  |
| SP2 |              | database | SMARCD3X4     | 726   | 734  | -      | 13.6735 | 1.11e-05 | 0.0285   | AGCCGGGCG       |
| SP2 |              | database | SMARCD3X4     | 372   | 388  | -      | 13.6379 | 1.2e-05  | 0.0135   | CCCCCGCTCCAGGA  |
| SP2 |              | database | SMARCD3X4     | 28    | 42   | -      | 13.6207 | 1.21e-05 | 0.0135   | CCCCCGCCCCAGAC  |
| SP2 |              | database | SMARCD3X4     | 760   | 776  | +      | 13.2921 | 1.31e-05 | 0.00968  | GCTGGGCGGAGCTGG |
| SP2 |              | database | SMARCD3X4     | 688   | 704  | -      | 13.2247 | 1.39e-05 | 0.00968  | CCCCCGCGGAGGCGC |
| SP2 |              | database | SMARCD3X4     | 205   | 221  | +      | 12.809  | 1.94e-05 | 0.00968  | AGGGCGGCGGTCGGA |
| SP2 |              | database | SMARCD3X4     | 692   | 708  | -      | 12.7079 | 2.09e-05 | 0.00968  | GCTGGGCGGCGGAG  |
| SP2 |              | database | SMARCD3X4     | 390   | 396  | +      | 12.6995 | 2.11e-05 | 0.00968  | GGGGGGGGGGCGCT  |

(b)

**Protein:**

MVNILAADWPQLQAGQGLRRPGRVAGGGARAAPPEEDGAVRGSEPPPPPPRPVSGG  
RRFRGPGGGGPGASSRLPGESGRCCRAGGEGGEVDPGTWRGCPGWGLCGWSPEAFLGPRV  
PRELRFAPLRVPGVGRAGNTRSLSDSMAATAAVSPSEYLQPAASTAQDSQPSPLALLAA  
TCSKIGPPAVEAAVTPAPPQPTPRKLVPIKAPLPLGSGKNFGLSSKGNLFQIQGSG  
VGTSYPGGQLVFAIQNPTVISKGRSSANIQYQAVPQIAAGGQTQIQVQNLTNQIQIP  
GTNQAILTPSSSSHKVPVKKPAPAKSGASPVQSSNVVLTGGSNVTLTLPNNLVNTT  
ESSTQAQVIAESPSKPGKKTRKAMSPSPSTVAVAEQVETVLIETAEINIQAGNNLLI  
VQSPGSGQPAVVQGVVQPKQESQVQIPQALRVVQAASATLPTVPQKSSNIQIQT  
ESTPTQVYFKTPSGELQTVLLQEAFAVTVAPSTSCSSPVSRNSGTVTSKKPTARKERP  
LPKIAPAGGVISLAAQLAAQAIAQTININGVQGVPTITNAGGQQQLTVGNVSGNN  
LTISGLSPTQQLQMEQALSGELPQGEKRRRMACTCPNCKDGEKRPDQGGKKHICHIFE  
CGRTRFKTSLRAHVRLHTGERPFVCNWVFCGRFTRSDQLRHARTHTGDKRFECAQCQ  
KRFMRSDHLTKHYKTHLITKNL

**RNA:**

CCACGUGUGGGCUGCAGAAGCCGUCGGGAGCCCUUCCUUCGUGGGCUGAGCUUCCCG  
GGGGCGUGGAGCGCUGCUGCAGCGCUCUGGAGGGGAACUCCCGCUGUCCUCCUG  
AGGCACCCGGUGCUGCCCGCAGUCGGCUCGGGCGUGUCUCCGGCGUGCCUUGGACUG  
CACC CGGCGUGUUCUCAGAGGGAACGCAUCGCCCGGGUGUCUCAGUACAGAGUG  
CUCGCAUCUGACCGCUGCUCUACGCGAGCGCGUGCCGCGUGCUUUGGACAGCGGUUC  
UCCUCCUCCUCCUCCGUUUCUUGCAUCCCGAGCUCUCCUCCAGUCCUCCUCUCAGCA  
CCACCUUGGAGGAGCCUUGGGGUAAGCUGCUGGAAAGACCAGCACAAUUAUUGUG  
AGAGUGAUGGGAAGGUGAGGUGGUUACCCGUUUGUUGGUGUGGGGACCUUUUCCUGC  
UUUUCUGGUGUGGUCACAUCCACCCUGAAGCUGAUCUGAUCUCCAGAUCCUCCUGC  
GCUGGUGAGAACCCAGGAUCCUCAUCAGAGGUGGACCCUCCAGCACCAUUGCUGGGA  
UGAAUGGUGAUUUUGACCAUCUCCUACCUUGUGCAGAGCGACACCCCAUGAGGGCCCAUA  
UACUCCUCAACUUCUUCUGGAAGAUACCAUCCAAACUCCGAGAGUGCAUCUGCA  
UUUGGCGCCUUCUUCAGGAUGGUGGGGAGCAGGAGCUGUUGAUUCUCCUUCUCCCG  
UUUGGGAAGGACACAUACCCACCCAGGAGAGUCCUCCAGAGGGGAUGACAUCUCCUUG  
CCAGGUCCUGCGGGACAGACUUGCCAGUUCUCCAGGGAAGCUGCUGCUGUGCUGUCU  
GCUUGGAAGUGAGACCAGGUCUUGCAGUGACCAUCCAGUCCUGUGGUAUUGGG  
GCUUGCAGCAGUGCCUUCUUGGAGAAUGACUUCAGUAGCUGCCUGGAGGAGCGCG  
UGCACCUCUUGAAGAAAGCAUUCUUGGUGUACUGCUCAGUACUACCAACCCAGCU  
GUUCACCAUAGGGACUGCCAUAGGAGGCCAGAUUCUCCAAAGCAGGAUUCUUGCCU  
CGGCCUAGGGAAGGAUUCAGCCUUGGCCCGCUCUUGGGCAUCUGAGGAGCUGGA  
UCCAAUUGCAUCUCCCGCUGCUCUUGAGCUGCUCUUCAGGUAUUAUAGAUUG  
UCUGCUGCUCAGUCAUCAUGAUACAUAUCUGGUUCCUACCCCAUUCUGUGGAUAA  
GGUUGCUGCUCUCCUUGGUGCAGACAUUGAGCUGUAGGUGUUGGCAUUGCCUAGC  
CUGGCACAGGAGAAUGAAAAGCUGGAAGCUGGAAUUGUCCUACCUAGCUGUAUAGC  
GUUAUCACAGCUCUUCAGGACUGACCUUCCACUGCUGCUUGUUGUUCUCCAGCCAAAU  
CUCUGAUACUUAUUGCCCAUUGAUUUUUUUUUGUCUUCGACCCAAACGACUGGA  
AACUUUCCCGCGUCUUCUAGUACAUUCUGAAGAUUGUAAAAAUAAGAAAGAA  
AGAAACCAAGCAACAGAC

**Interaction probabilities**

Prediction using RF classifier 0.7  
Prediction using SVM classifier 0.65

**Figure S3** Prediction results of the htTFtarget database and RIPseq website. (a) The SP2 transcriptional factor may combine with the 2000 bp upstream of the functional gene *SMARCD3X4*. (b) The SP2 transcriptional factor is predicted to be combined with *SMARCD3-OT1*.



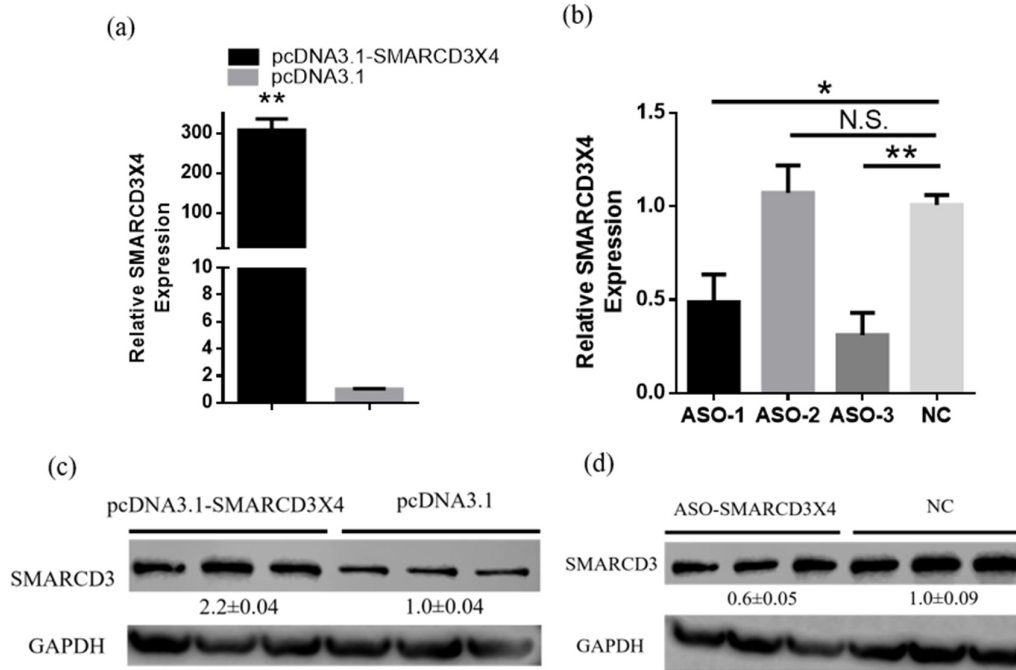

**Figure S4** The fold-changes of *SMARCD3X4* in mRNA and protein levels after overexpression and knockdown. **(a)** Relative *SMARCD3X4* expression in mRNA level after introducing overexpression vector of *SMARCD3X4* into CPMs (n = 6). **(b)** Relative *SMARCD3X4* expression in mRNA level after introducing ASO of *SMARCD3X4* into CPMs (n = 6). **(c)** Relative *SMARCD3X4* expression in protein level after introducing overexpression vector of *SMARCD3X4* into CPMs (n = 3). **(d)** Relative *SMARCD3X4* expression in protein level after introducing ASO of *SMARCD3X4* into CPMs (n = 3). The numbers shown below the bands were folds of band intensities relative to control. Band intensities were quantified by ImageJ and normalized to GAPDH. Data are expressed as a fold change relative to the control. Results are shown as mean ± SEM. Statistical significances of differences between means were assessed using an independent sample t-test. \* $p < 0.05$ , \*\* $p < 0.01$ .
